# Supplementary material for: Similarities and differences in the localization, trafficking, and function of P-glycoprotein in MDR1-EGFP-transduced rat versus human brain capillary endothelial cell lines
Source: PubMed Central journal article supplement (PMC8330100; doi:10.1186/s12987-021-00266-z), 2021-08-03
Supplement: 12987_2021_266_MOESM1_ESM.pdf [file 12987_2021_266_MOESM1_ESM.pdf]

**Additional file 1**

Influence of insert characteristics (Transwell® vs. ThinCert® and TC-insert system) on monolayer formation and barrier integrity was assessed by comparison of transendothelial electrical resistance (TEER) and mannitol permeability of hCMEC/D3 and RBE4 cells. The pore diameter was 0.4 µm. Prior to seeding, the membranes were coated with rat-tail collagen type I. Data are presented as the mean ±SEM of 3-8 replicates. Significant differences between TEER values or mannitol permeability between RBE4 or hCMEC/D3 monolayers grown on the same insert were calculated by unpaired t-test and indicated by an asterisk (P < 0.05). Statistical differences between TEER values within hCMEC/D3 or RBE4 monolayers grown on different insert types calculated using one-way ANOVA (Bonferroni *posthoc* test) were indicated by # (vs. Greiner, 12-well) and † (vs. Corning, 6-well). Mannitol permeability of hCMEC/D3 or RBE4 monolayers was significantly different between all insert types (P < 0.05).

| Cell type   | TEER<br>(Ω·cm <sup>2</sup> ) | Mannitol permeability |                | Insert type                     | Membrane material | Pore density<br>(pores/cm <sup>2</sup> ) |
|-------------|------------------------------|-----------------------|----------------|---------------------------------|-------------------|------------------------------------------|
|             |                              | (nm/s)                | (%/h)          |                                 |                   |                                          |
| hCMEC/D3-WT | 16.57 ± 1.06                 | 53.76 ± 4.32          | 3.71 ± 0.13    | 12-well, Greiner, #665641       | PET               | 2 · 10 <sup>6</sup>                      |
| RBE4-WT     | 15.55 ± 1.22                 | 59.58 ± 4.07          | 4.20 ± 0.30    | 12-well, Greiner, #665641       | PET               | 2 · 10 <sup>6</sup>                      |
| hCMEC/D3-WT | 6.78 ± 0.18 *#†              | 198.19 ± 4.89         | 15.95 ± 0.30 * | 12-well, Sarstedt, #83.3931.040 | PET               | 1 · 10 <sup>8</sup>                      |
| RBE4-WT     | 4.22 ± 0.18 #†               | 210.15 ± 3.52         | 19.18 ± 0.13   | 12-well, Sarstedt, #83.3931.040 | PET               | 1 · 10 <sup>8</sup>                      |
| hCMEC/D3-WT | 8.21 ± 0.37                  | 135.06 ± 3.72*        | 11.17 ± 0.36   | 12-well, Corning, #3460         | PET               | 4 · 10 <sup>6</sup>                      |
| RBE4-WT     | 7.09 ± 0.37 #†               | 153.89 ± 2.15         | 11.15 ± 0.24   | 12-well, Corning, #3460         | PET               | 4 · 10 <sup>6</sup>                      |
| hCMEC/D3-WT | 14.01 ± 1.35 #               | 100.32 ± 2.02         | 14.76 ± 1.01   | 6-well, Corning, #3412          | PC                | 1 · 10 <sup>8</sup>                      |
| RBE4-WT     | 17.12 ± 1.56                 | 113.41 ± 11.82        | 13.62 ± 0.80   | 6-well, Corning, #3412          | PC                | 1 · 10 <sup>8</sup>                      |
