# Supplementary material for: Similarities and differences in the localization, trafficking, and function of P-glycoprotein in MDR1-EGFP-transduced rat versus human brain capillary endothelial cell lines
Source: PubMed Central journal article supplement (PMC8330100; doi:10.1186/s12987-021-00266-z), 2021-08-03
Supplement: 12987_2021_266_MOESM2_ESM.pdf [file 12987_2021_266_MOESM2_ESM.pdf]

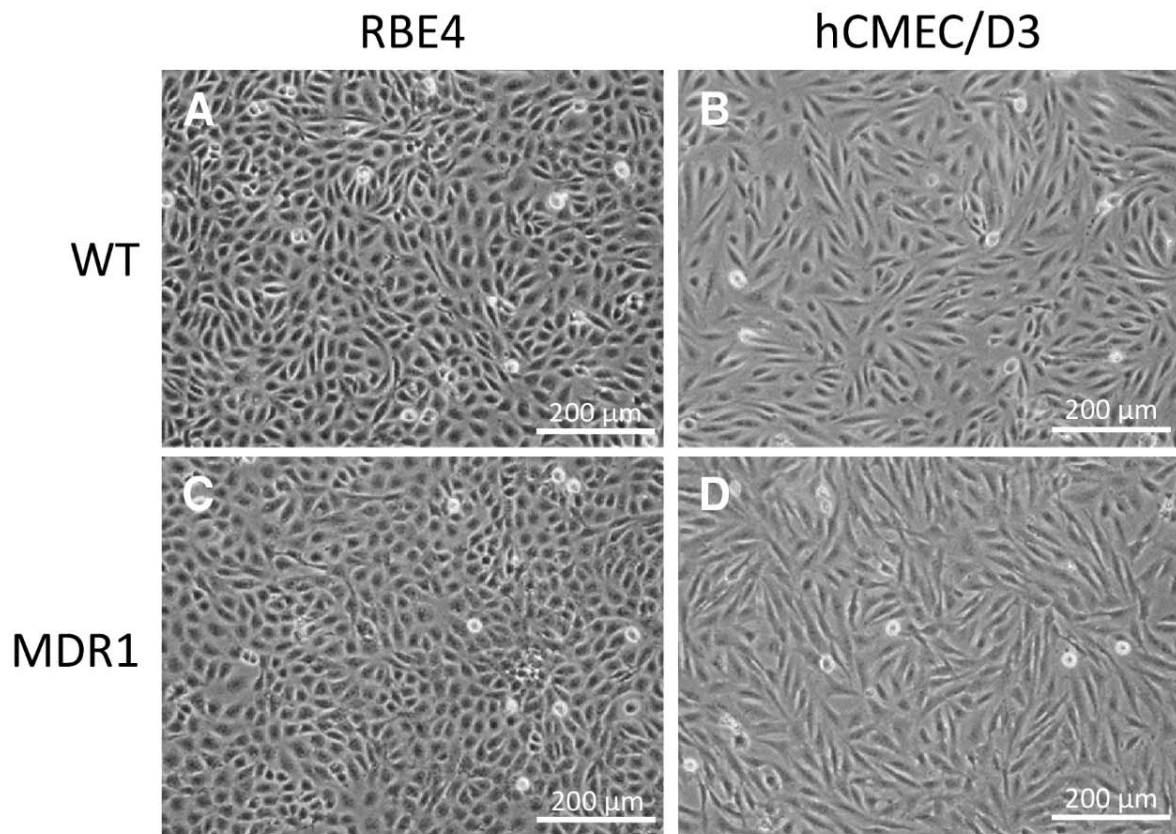

**Additional file 2**

**Cell morphology of RBE4 and hCMEC/D3 wildtype and *MDR1*-EGFP expressing cells.**

Cells were grown until confluency and cell morphology was analyzed by phase-contrast microscopy.
