# Supplementary material for: Similarities and differences in the localization, trafficking, and function of P-glycoprotein in MDR1-EGFP-transduced rat versus human brain capillary endothelial cell lines
Source: PubMed Central journal article supplement (PMC8330100; doi:10.1186/s12987-021-00266-z), 2021-08-03
Supplement: 12987_2021_266_MOESM3_ESM.pdf [file 12987_2021_266_MOESM3_ESM.pdf]

rBCECs

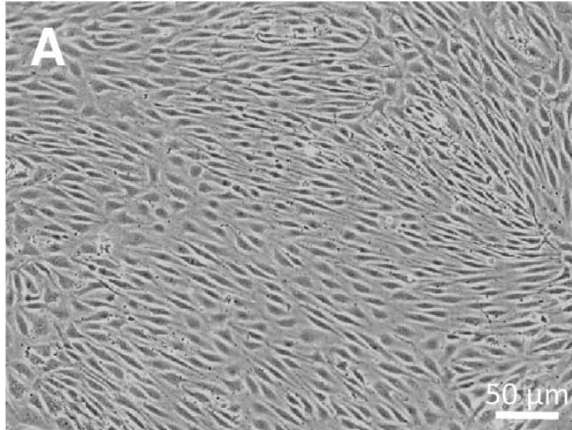

LLC-MDR1

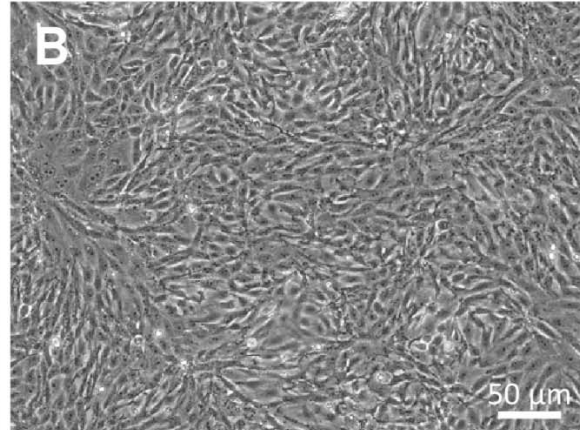

**Additional file 3**

**Morphology of primary rat brain capillary endothelial cells (rBCECs) and immortalized LLC-MDR1 kidney epithelial cells.** Cells were grown until confluency and cell morphology of the primary culture of rBCECs (A) and the epithelial cell line LLC-MDR1 (B) were depicted by phase-contrast microscopy.
