# Supplementary material for: Similarities and differences in the localization, trafficking, and function of P-glycoprotein in MDR1-EGFP-transduced rat versus human brain capillary endothelial cell lines
Source: PubMed Central journal article supplement (PMC8330100; doi:10.1186/s12987-021-00266-z), 2021-08-03
Supplement: 12987_2021_266_MOESM5_ESM.pdf [file 12987_2021_266_MOESM5_ESM.pdf]

## Lysosomotropic effect of doxorubicin

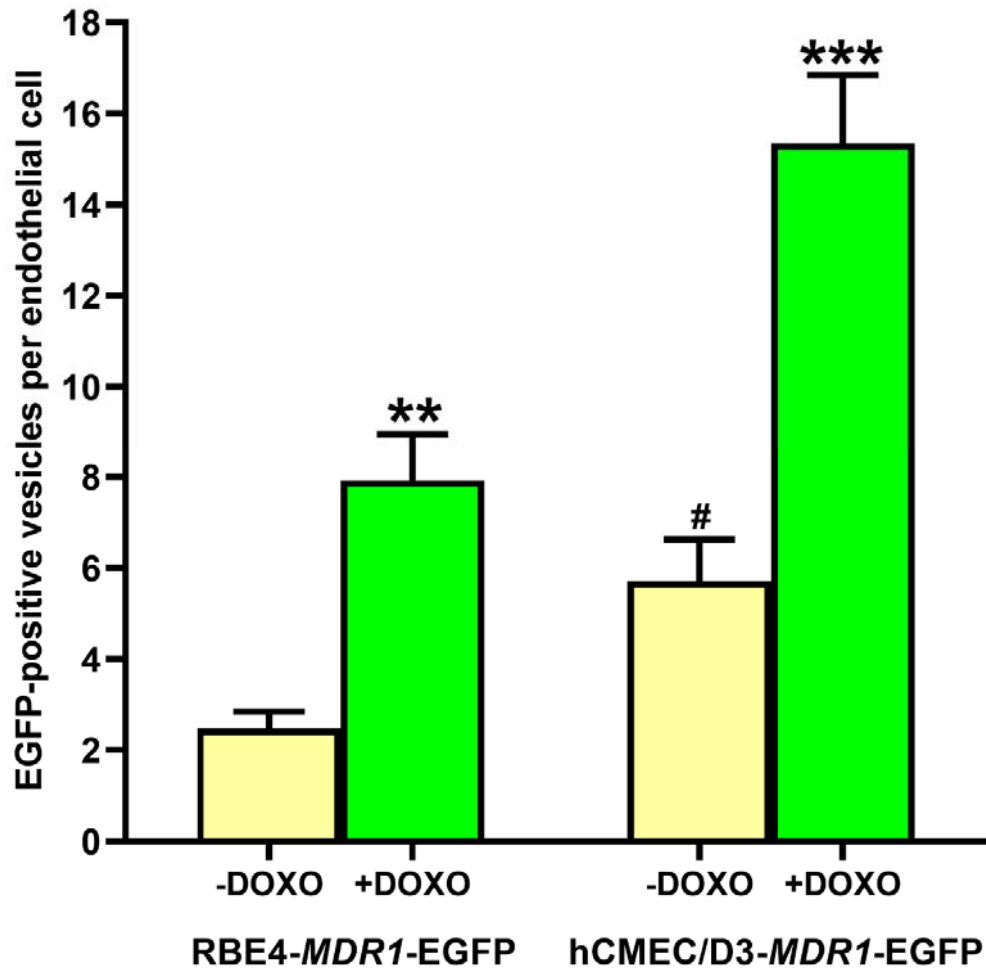

### Additional file 5

**Pgp-EGFP-positive intracellular vesicles in RBE4 and hCMEC/D3 cells before and after exposure to doxorubicin (DOXO).** Pgp-EGFP-positive intracellular vesicles were counted in 60-81 RBE4 cells and 46 hCMEC/D3 cells; data are shown as mean  $\pm$  SEM. Data were analyzed by nonparametric one-way ANOVA (Kruskal-Wallis test) followed by Dunn's multiple comparisons test. For each cell line, significant differences in the number of Pgp-EGFP-positive intracellular vesicles before vs. 24 h after DOXO treatment are indicated by asterisks (\*\* $P$ <0.001; \*\*\* $P$ <0.0001). Significant differences in the number of Pgp-EGFP-positive intracellular vesicles in RBE4 vs. hCMEC/D3 cells before DOXO treatment are indicated by the hash sign (# $P$ <0.05).
